# Supplementary material for: Unlocking the Transcriptional Control of NCAPG in Bovine Myoblasts: CREB1 and MYOD1 as Key Players
Source: MDPI journal article supplement (doi:10.3390/ijms25052506), 2024-02-21
Supplement: s1 [file s1]

## Supplementary Information

**Supplementary Table S1. The primer sequences for RT-PCR, qRT-PCR, Promoter cloning, site-mut, EMSA and**

### Overexpression

| Item              | Primer name      | Primer Sequence(5' to 3')                                                            |
|-------------------|------------------|--------------------------------------------------------------------------------------|
| RT-PCR            | <i>NCAPG</i>     | F: TCTTCCAACCTCTGCAAACACTG<br>R: GCCTGAGGATTTAACCCACTT                               |
|                   | <i>CREB1</i>     | F: TGTTATGGCGTCTTCCCCAG<br>R: TTCAAGCACTGCCACTCTGT                                   |
|                   | <i>MYOD1</i>     | F: CGCTCCCTTCCCAAGTGAT<br>R: TACAAAGTCCCTGTGCGACC                                    |
|                   | <i>MYOC</i>      | F: TACAGCAACCTCGTCCGTC<br>R: AATTCCATTTAGCAACTTCCCT                                  |
|                   | <i>Pax7</i>      | F: AGGTCTGGTTCAGTAACCGC<br>R: GCTGACGGGGTTCATGTGAT                                   |
|                   | <i>MHC</i>       | F: TGCAACCATGAGTGCGAGT<br>R: CAGAGGGCTTACACAAGGGG                                    |
|                   | <i>CDK2</i>      | F: AGGGAACGTACGGAGTTGTG<br>R: GACATCCAGCAGCTTGACAAT                                  |
|                   | <i>PCNA</i>      | F: CCTTGGTGCAGCTAACCCTT<br>R: TTGGACATGCTGGTGAGGTT                                   |
|                   | <i>CyclinD1</i>  | F: ATGAAGGAGACCATCCCCCT<br>R: CGCCAGGTTCCACTTGAGTT                                   |
|                   | <i>GAPDH</i>     | F: AAGTTCAACGGCACAGTCA<br>R: GTCATAAGTCCCTCCACGAT                                    |
| Promoter cloning  | <i>NCAPG F/R</i> | F: GCAAGGGAATGGATGAAC<br>R: GAAGGCCTCCTTAATCAG                                       |
|                   | <i>NCAPG-F1</i>  | F: CTAGCTAGCTCGGCTCCAATAGTCGAATC                                                     |
|                   | <i>NCAPG-F2</i>  | F: CTAGCTAGCGTGGGCATTGACCAGAAG                                                       |
|                   | <i>NCAPG-F3</i>  | F:CTAGCTAGCATCCCGTGGAGGAGGAAATG                                                      |
|                   | <i>NCAPG-F4</i>  | F: CTAGCTAGCGGAGGGAAGATAGTTCGATAGG                                                   |
|                   | <i>NCAPG-F5</i>  | F: CTAGCTAGCACCTCTATAGGGCAGAAC                                                       |
|                   | <i>NCAPG-F6</i>  | F:CTAGCTAGCAGCTGCACTAATCAGACC                                                        |
|                   | <i>NCAPG-F7</i>  | F: CTAGCTAGCGCAAGGGAATGGATGAAC                                                       |
| Site-mut and EMSA | <i>NCAPG</i>     | R:CCGCTCGAGGAAGGCCTCCTTAATCAG                                                        |
|                   | <i>MYOD1</i>     | F:AAGACCCGATTAGGCCTAGGCGGTGGTCGTCGGCTCCAATAGTCGAATC                                  |
|                   | <i>MYOD1</i>     | R: GATTGCACTATTGGAGCCGAGCGGTGGTCGCTAGGCCTAATCGGGTCTT                                 |
|                   | <i>mMYOD1</i>    | F: CCAGCCGCAAGACCCGATTAGGCCTAGGCGGTGGTCGTCGGCTCCAATAGTCGAATCTC                       |
|                   | <i>mMYOD1</i>    | R: GAGATTGCACTATTGGAGCCGACGACCACCGCCTAGGCCTAATCGGGTCTTGCGGCTGG                       |
|                   | <i>CREB1</i>     | F: ATGTTGAAGGCGGTGGATTCAAGAGAAGGTCACTCGCCGCTCTACGCACTCGC                             |
|                   | <i>CREB1</i>     | R: GCGAGTGCCTAGAGCGGCGAGAGAGAAGGTCATGAATCCACCGCCTTCAACAT                             |
|                   | <i>mCREB1</i>    | F: CGATGTTGAAGGCGGTGGATTGATGAGAAGGTCGACTCGCCGCTCTACGCACTCGCGGT                       |
|                   | <i>mCREB1</i>    | R: ACCGCGAGTGCCTAGAGCGGCGAGTCGACCTTCTCATGAATCCACCGCCTTCAACATCG                       |
|                   | <i>NCAPG</i>     | F: AAGGCGGCCGCTATGGGGAAGGAGAAGAGACTGC<br>R: CCCTCTAGACTAAGTTGTATCTTCATTGAGAAATTGTGCA |
| Overexpression    | <i>MYOD1</i>     | F: CGCGGATCCATGGAGCTACTGTGCCACC<br>R: CCGCTCGAGGAGCACCTGGTATATCGGGTT                 |
|                   | <i>CREB1</i>     | F: CGCGGATCCATGACCATGGAATCTGGAGCCGAGA<br>R: GCTCTAGAATCTGATTTGTGGCAGTAAAGGT          |
