# Supplementary material for: Unlocking the Transcriptional Control of NCAPG in Bovine Myoblasts: CREB1 and MYOD1 as Key Players
Source: MDPI journal article supplement (doi:10.3390/ijms25052506), 2024-02-21
Supplement: s1 [file s1]

## Supplementary Materials:

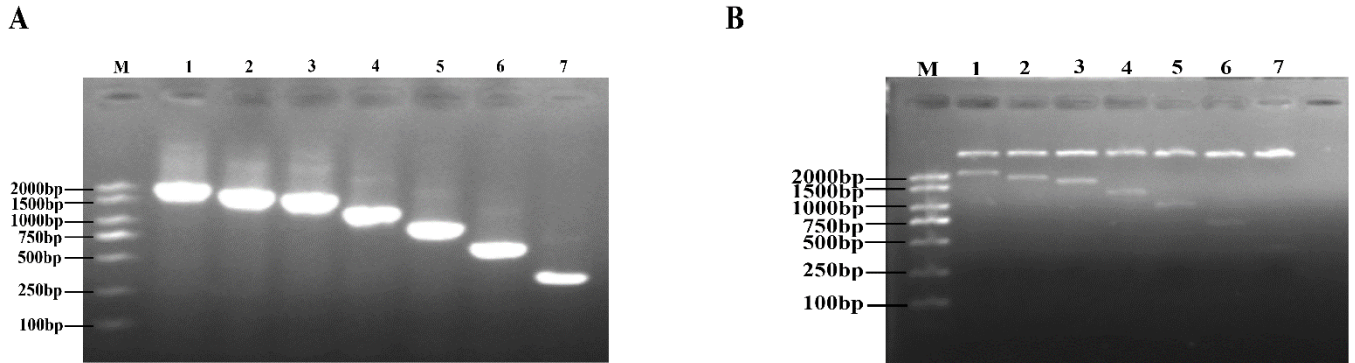

**Figure S2.** Agarose gel electrophoresis of the original deletion promoter fragment. (A) Different lengths of fragments of NCAPG promoter cloned by PCR. (B) Detection of vectors construction of NCAPG promoter in different lengths fragments. M: marker, 1: NCAPG-F1(-1952/+87), 2: NCAPG-F2(-1686/+87), 3: NCAPG-F3(-1519/+87), 4: NCAPG-F4(-1151/+87), 5: NCAPG-F5(-875/+87), 6: NCAPG-F6(-598/+87), and 7: NCAPG-F7(-350/+87).
