# Supplementary figures and images for: Unlocking the Transcriptional Control of NCAPG in Bovine Myoblasts: CREB1 and MYOD1 as Key Players
Source: MDPI journal article supplement (doi:10.3390/ijms25052506), 2024-02-21

## Supplementary Materials:

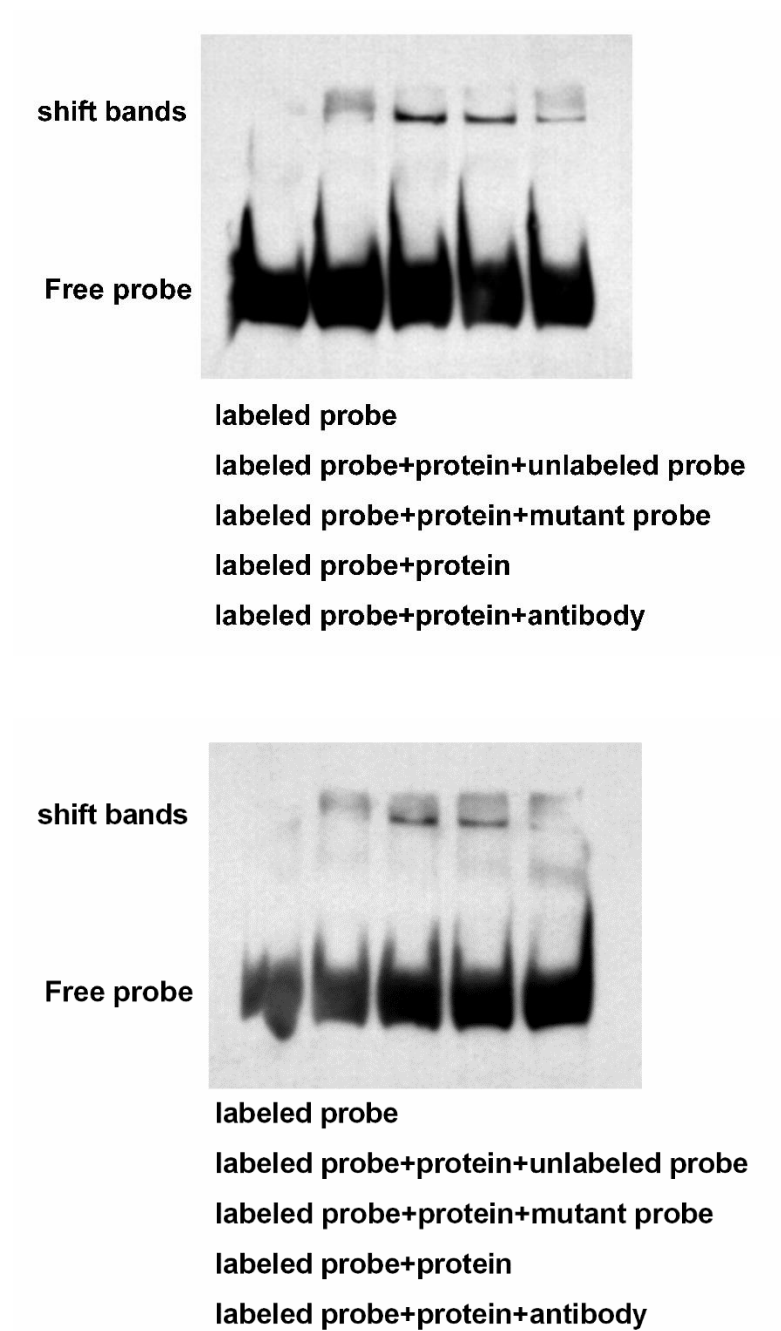

Figure S1. Original EMSA figures

Supplement: s1 [file s1]
